# Supplementary material for: Dynamics of the Fermentation Process and Chemical Profiling of Pomegranate (Punica granatum L.) Wines Obtained by Different Cultivar×Yeast Combinations
Source: MDPI journal article supplement (doi:10.3390/foods10081913), 2021-08-18
Supplement: s1 [file s1]

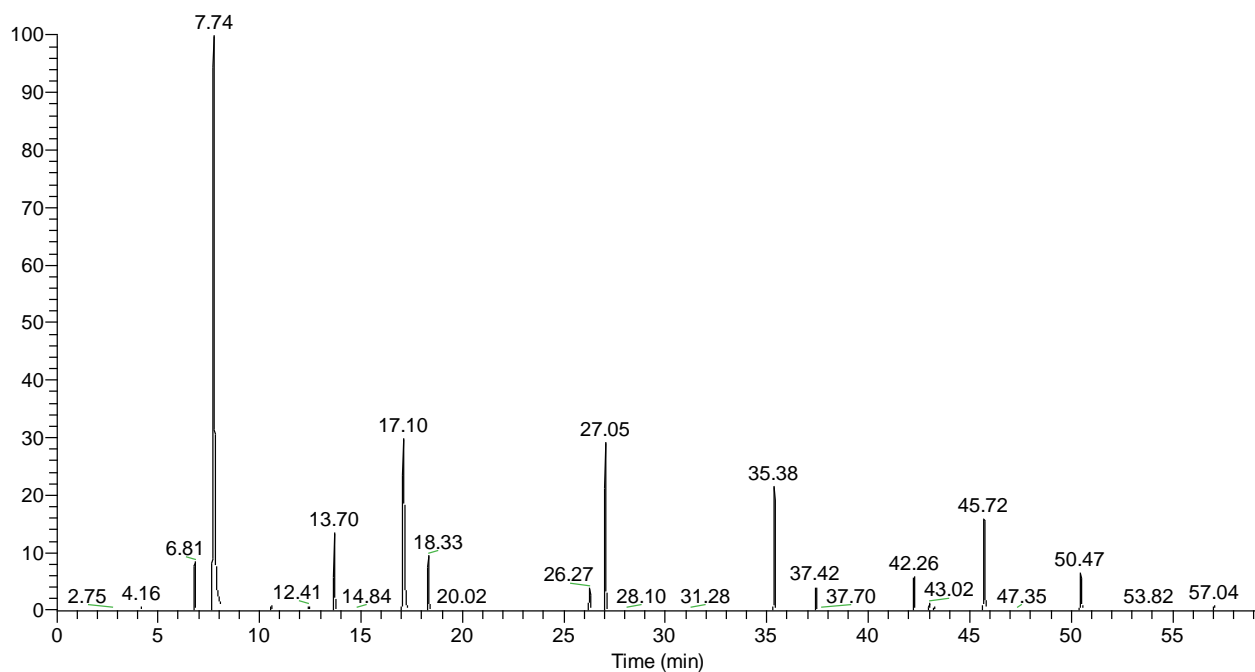

#### JOLLY RED – EC1118

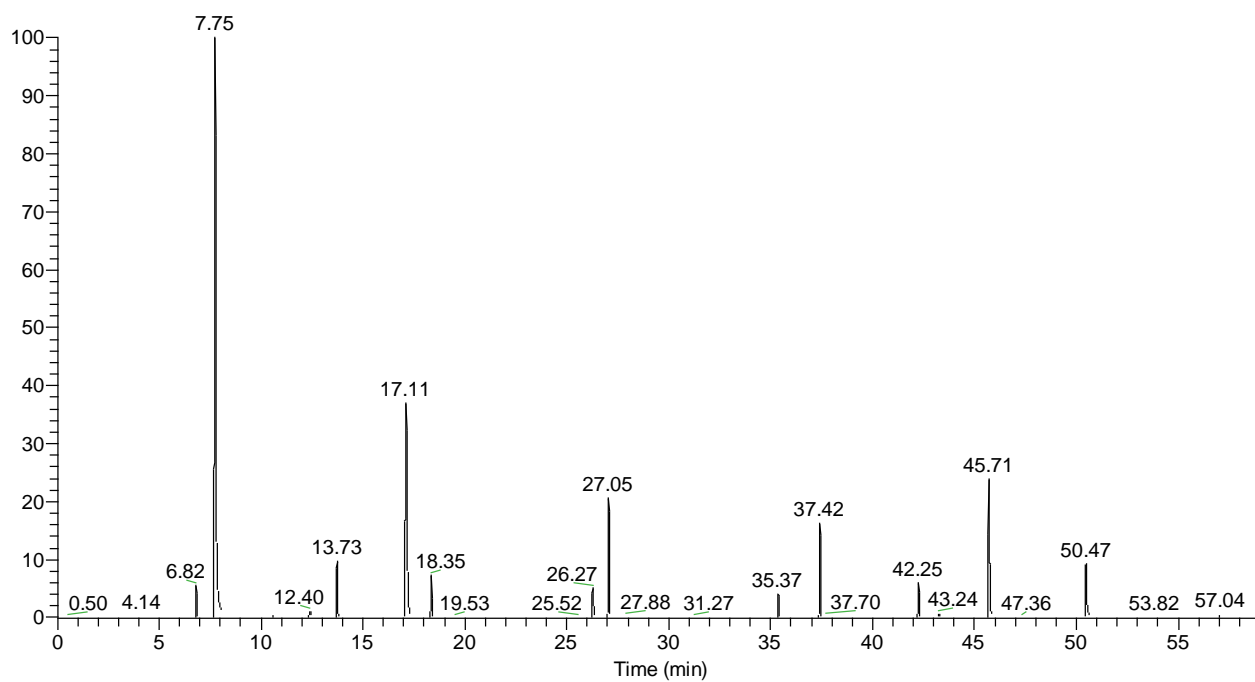

#### JOLLY RED – CLOS

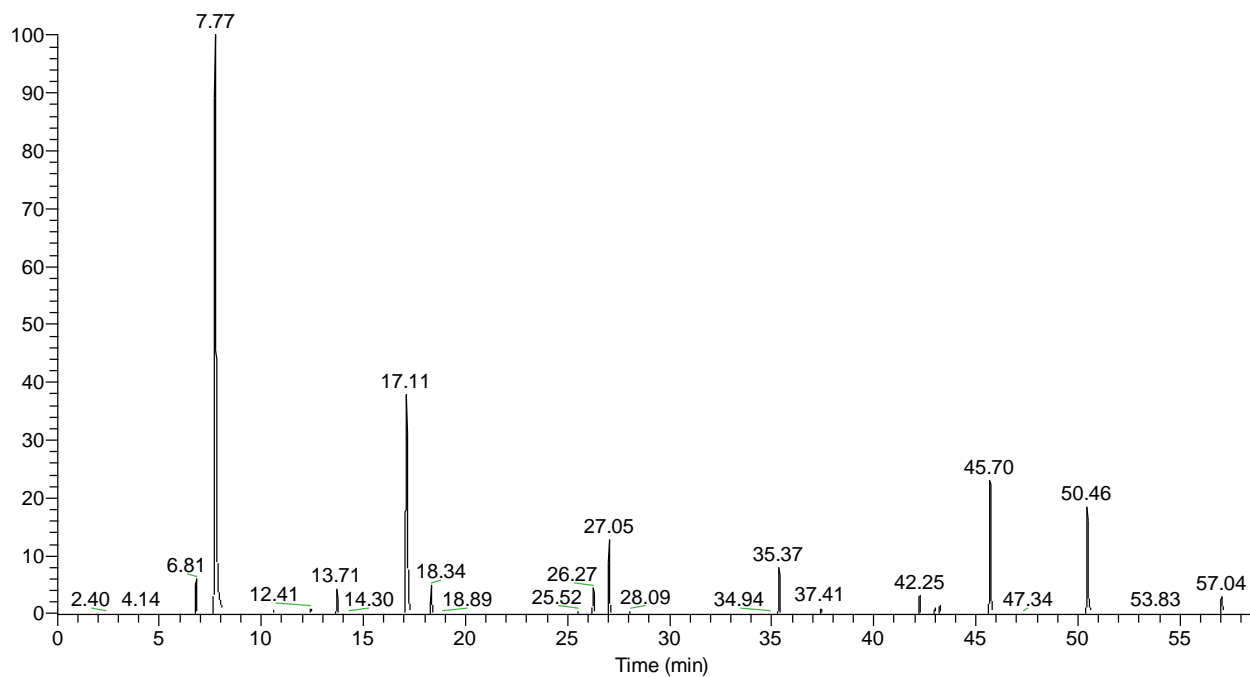

SMITH – EC1118

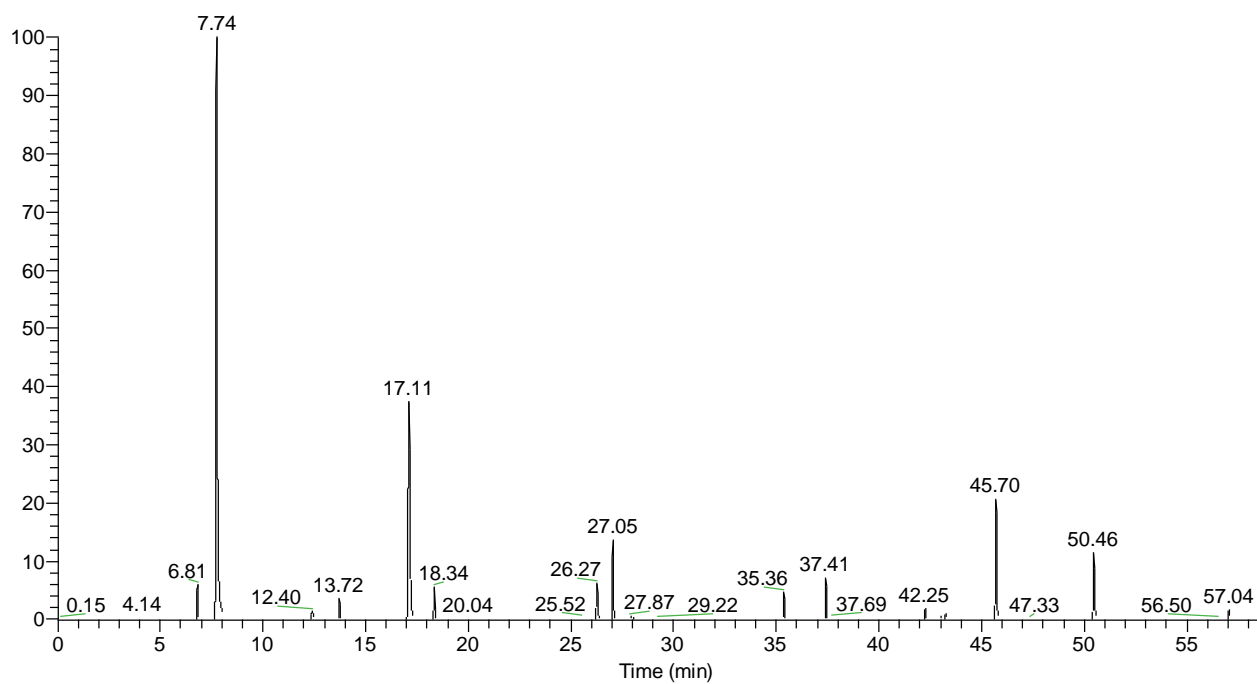

SMITH – CLOS

Figure S1. Sample chromatograms of SPME-GC/MS analysis of the pomegranate wines.
