# Supplementary material for: Dynamics of the Fermentation Process and Chemical Profiling of Pomegranate (Punica granatum L.) Wines Obtained by Different Cultivar×Yeast Combinations
Source: MDPI journal article supplement (doi:10.3390/foods10081913), 2021-08-18
Supplement: s1 [file s1]

Tab. S1. Oenological and physiological properties of the yeasts used in this work, as reported by the manufacturer (Lallemand Inc., Montreal, Canada; [www.lallemandwine.com/en/uk-scandinavia/products/catalogue/wine-yeasts/20/lalvin-ec1118--prise-de-mousse/](http://www.lallemandwine.com/en/uk-scandinavia/products/catalogue/wine-yeasts/20/lalvin-ec1118--prise-de-mousse/) and [www.lallemandwine.com/fr/france/produits/catalogue/levures-oenologiques/12/lalvin-clos/](http://www.lallemandwine.com/fr/france/produits/catalogue/levures-oenologiques/12/lalvin-clos/) - accessed on 2021/08/07). nd.: not determined

| Property                             | <i>Saccharomyces cerevisiae</i> Clos | <i>Saccharomyces cerevisiae</i> (ex-bayanus) EC1118 |
|--------------------------------------|--------------------------------------|-----------------------------------------------------|
| Fermentation temperature range (°C)  | 10-30                                | 13-35                                               |
| Sugar preference                     | Glucosophilic                        | Fructosophilic                                      |
| Killer toxin                         | Yes                                  | Yes                                                 |
| Resistance to Ethanol                | 17%                                  | ≤18%                                                |
| Latency (lag phase)                  | Short/Very short                     | Short/Very short                                    |
| Fermentation vigor                   | High                                 | High                                                |
| Fermentation dynamic                 | Fast and regular                     | Fast                                                |
| N requirements                       | Low/Medium                           | Low                                                 |
| O <sub>2</sub> requirement           | nd.                                  | Low                                                 |
| Acetic acid production               | Low                                  | Low                                                 |
| Acetaldehyde production              | Moderate                             | Low                                                 |
| H <sub>2</sub> S production          | Low                                  | Very low                                            |
| SO <sub>2</sub> production           | Low                                  | Moderate/High                                       |
| Glycerol production                  | High                                 | High                                                |
| Foam production                      | nd.                                  | Low                                                 |
| Resistance to SO <sub>2</sub>        | High                                 | nd.                                                 |
| Interaction with malolactic bacteria | Positive                             | Neutral                                             |
| Impact on organoleptic properties    | High                                 | Low                                                 |
| Suitable for secondary fermentation  | No                                   | Yes                                                 |
| Flocculation                         | No                                   | Yes                                                 |
| Prevalence over native yeasts        | nd.                                  | High                                                |
